# Supplementary material for: An epigenetic biomarker combination of PCDH17 and POU4F2 detects bladder cancer accurately by methylation analyses of urine sediment DNA in Han Chinese
Source: PubMed Central journal article supplement (PMC4823069; doi:10.18632/oncotarget.6666), 2015-12-19
Supplement: oncotarget-07-2754-s001.pdf [file oncotarget-07-2754-s001.pdf]

# An epigenetic biomarker combination of PCDH17 and POU4F2 detects bladder cancer accurately by methylation analyses of urine sediment DNA in Han Chinese

## Supplementary Materials

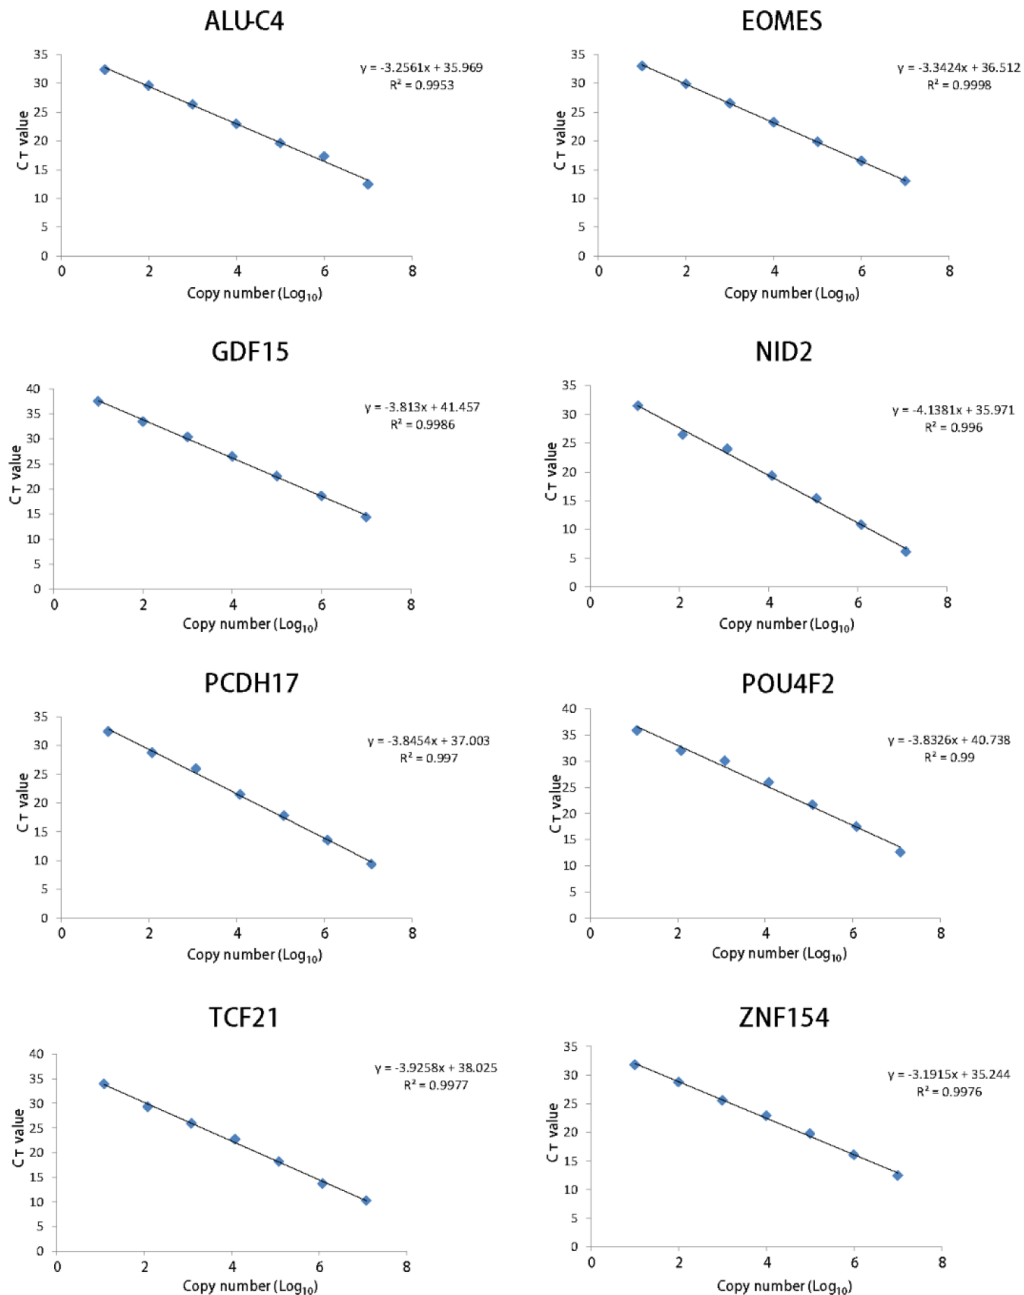

Supplementary Figure S1: Standard curves of the candidate genes.

**Supplementary Table S1: Clinical information of the training set**

| Case ID | Gender | Age | Grade | TNM     | Primary/<br>recurrent |
|---------|--------|-----|-------|---------|-----------------------|
| UCC01   | male   | 64  | high  | T4N1M0  | primary               |
| UCC02   | male   | 73  | high  | T2bN0M0 | primary               |
| UCC03   | female | 63  | high  | TaN0M0  | primary               |
| UCC04   | female | 40  | high  | T2bN0M0 | primary               |
| UCC05   | male   | 40  | low   | T1N0M0  | primary               |
| UCC06   | female | 46  | high  | TaN0M0  | primary               |
| UCC07   | female | 62  | low   | T1N0M0  | recurrent             |
| UCC08   | female | 33  | high  | T1N0M0  | primary               |
| UCC09   | female | 72  | high  | T3bN0M0 | primary               |
| UCC10   | male   | 73  | high  | TaN0M0  | primary               |
| UCC11   | male   | 70  | high  | T1N0M0  | primary               |
| UCC12   | male   | 61  | high  | T2N0M0  | primary               |
| UCC13   | male   | 75  | high  | T2bN0M0 | primary               |
| UCC14   | male   | 50  | low   | T1N0M0  | recurrent             |
| UCC15   | female | 73  | high  | T2bN0M0 | primary               |
| UCC16   | male   | 50  | low   | T2aN0M0 | primary               |
| UCC17   | male   | 56  | high  | T1N0M0  | recurrent             |
| UCC18   | male   | 43  | low   | TaN0M0  | primary               |
| UCC19   | male   | 59  | high  | T3aN0M0 | primary               |
| UCC20   | female | 55  | low   | TaN0M0  | recurrent             |
| UCC21   | male   | 58  | high  | T2aN0M0 | primary               |
| UCC22   | male   | 35  | low   | T1N0M0  | recurrent             |
| UCC23   | male   | 66  | high  | T1N0M0  | recurrent             |
| UCC24   | male   | 59  | high  | T1N0M0  | primary               |
| UCC25   | male   | 74  | high  | TaN0M0  | primary               |
| UCC26   | male   | 49  | high  | T2aN0M0 | recurrent             |
| UCC27   | female | 41  | high  | T3bN3M1 | primary               |
| UCC28   | male   | 68  | high  | TaN0M0  | recurrent             |
| UCC29   | male   | 74  | high  | T2aN0M0 | primary               |
| UCC30   | male   | 61  | high  | T1N0M0  | primary               |
| UCC31   | male   | 74  | high  | T4aN2M0 | primary               |
| UCC32   | male   | 54  | high  | T1N0M0  | primary               |
| UCC33   | male   | 71  | low   | TaN0M0  | primary               |
| UCC34   | male   | 70  | high  | T1N0M0  | recurrent             |
| UCC35   | male   | 68  | high  | T2N0M0  | recurrent             |
| UCC36   | male   | 87  | high  | T1N0M0  | primary               |
| UCC37   | male   | 55  | high  | T1N0M0  | primary               |

|              |        |    |      |         |           |
|--------------|--------|----|------|---------|-----------|
| <b>UCC38</b> | male   | 66 | high | T1N0M0  | primary   |
| <b>UCC39</b> | male   | 48 | low  | T1N0M0  | primary   |
| <b>UCC40</b> | male   | 54 | low  | TaN0M0  | primary   |
| <b>UCC41</b> | female | 75 | high | T1N0M0  | recurrent |
| <b>UCC42</b> | male   | 79 | low  | TaN0M0  | primary   |
| <b>UCC43</b> | male   | 67 | high | T2N0M0  | primary   |
| <b>UCC44</b> | female | 80 | low  | TaN0M0  | primary   |
| <b>UCC45</b> | male   | 74 | high | T2bN0M0 | primary   |
| <b>UCC46</b> | male   | 45 | high | T3N0M0  | primary   |
| <b>UCC47</b> | female | 41 | low  | T1N0M0  | primary   |
| <b>UCC48</b> | male   | 61 | high | T1N0M0  | primary   |
| <b>UCC49</b> | male   | 74 | high | T4aN2M0 | primary   |
| <b>UCC50</b> | male   | 49 | low  | TaN0M0  | primary   |
| <b>UCC51</b> | male   | 60 | high | T2bN0M0 | primary   |
| <b>UCC52</b> | male   | 66 | high | T3aN1M0 | recurrent |
| <b>UCC53</b> | female | 36 | high | T3aN0M0 | primary   |
| <b>UCC54</b> | female | 63 | low  | TaN0M0  | primary   |
| <b>UCC55</b> | female | 72 | low  | T1N0M0  | primary   |
| <b>UCC56</b> | male   | 83 | low  | T1N0M0  | primary   |
| <b>UCC57</b> | male   | 61 | high | T2bN0M0 | primary   |
| <b>UCC58</b> | male   | 35 | high | T1N0M0  | recurrent |
| <b>HV01</b>  | female | 25 | NA   | NA      | NA        |
| <b>HV02</b>  | female | 27 | NA   | NA      | NA        |
| <b>HV03</b>  | male   | 27 | NA   | NA      | NA        |
| <b>HV04</b>  | male   | 28 | NA   | NA      | NA        |
| <b>HV05</b>  | female | 28 | NA   | NA      | NA        |
| <b>HV06</b>  | male   | 28 | NA   | NA      | NA        |
| <b>HV07</b>  | male   | 27 | NA   | NA      | NA        |
| <b>HV08</b>  | female | 29 | NA   | NA      | NA        |
| <b>HV09</b>  | female | 29 | NA   | NA      | NA        |
| <b>HV10</b>  | male   | 26 | NA   | NA      | NA        |
| <b>HV11</b>  | female | 30 | NA   | NA      | NA        |
| <b>HV12</b>  | male   | 26 | NA   | NA      | NA        |
| <b>HV13</b>  | male   | 28 | NA   | NA      | NA        |
| <b>HV14</b>  | male   | 28 | NA   | NA      | NA        |
| <b>HV15</b>  | male   | 28 | NA   | NA      | NA        |
| <b>HV15</b>  | male   | 28 | NA   | NA      | NA        |
| <b>HV16</b>  | male   | 31 | NA   | NA      | NA        |
| <b>HV17</b>  | male   | 28 | NA   | NA      | NA        |

|              |        |    |    |    |    |
|--------------|--------|----|----|----|----|
| <b>HV18</b>  | male   | 26 | NA | NA | NA |
| <b>HV19</b>  | male   | 30 | NA | NA | NA |
| <b>HV20</b>  | male   | 28 | NA | NA | NA |
| <b>HV21</b>  | male   | 28 | NA | NA | NA |
| <b>HV22</b>  | male   | 29 | NA | NA | NA |
| <b>HV23</b>  | male   | 26 | NA | NA | NA |
| <b>HV24</b>  | male   | 28 | NA | NA | NA |
| <b>HV26</b>  | male   | 26 | NA | NA | NA |
| <b>HV27</b>  | male   | 30 | NA | NA | NA |
| <b>HV28</b>  | male   | 27 | NA | NA | NA |
| <b>HV29</b>  | male   | 30 | NA | NA | NA |
| <b>HV30</b>  | male   | 30 | NA | NA | NA |
| <b>IUC01</b> | female | 41 | NA | NA | NA |
| <b>IUC02</b> | female | 61 | NA | NA | NA |
| <b>IUC03</b> | male   | 55 | NA | NA | NA |
| <b>IUC04</b> | male   | 46 | NA | NA | NA |
| <b>IUC05</b> | female | 24 | NA | NA | NA |
| <b>IUC06</b> | male   | 46 | NA | NA | NA |
| <b>IUC07</b> | female | 30 | NA | NA | NA |
| <b>IUC08</b> | female | 85 | NA | NA | NA |
| <b>IUC09</b> | male   | 30 | NA | NA | NA |
| <b>IUC10</b> | female | 60 | NA | NA | NA |
| <b>IUC11</b> | female | 25 | NA | NA | NA |
| <b>IUC12</b> | female | 34 | NA | NA | NA |
| <b>IUC13</b> | female | 53 | NA | NA | NA |
| <b>IUC14</b> | female | 24 | NA | NA | NA |
| <b>IUC15</b> | female | 40 | NA | NA | NA |
| <b>IUC16</b> | male   | 51 | NA | NA | NA |
| <b>IUC17</b> | male   | 85 | NA | NA | NA |
| <b>IUC18</b> | female | 78 | NA | NA | NA |
| <b>IUC19</b> | male   | 83 | NA | NA | NA |
| <b>IUC20</b> | female | 44 | NA | NA | NA |
| <b>KC01</b>  | female | 79 | NA | NA | NA |
| <b>KC02</b>  | male   | 43 | NA | NA | NA |
| <b>KC03</b>  | male   | 56 | NA | NA | NA |
| <b>KC04</b>  | male   | 38 | NA | NA | NA |
| <b>KC05</b>  | female | 71 | NA | NA | NA |
| <b>KC06</b>  | male   | 62 | NA | NA | NA |
| <b>KC07</b>  | female | 38 | NA | NA | NA |

|             |        |    |    |    |    |
|-------------|--------|----|----|----|----|
| <b>KC08</b> | female | 78 | NA | NA | NA |
| <b>KC09</b> | male   | 82 | NA | NA | NA |
| <b>KC10</b> | male   | 31 | NA | NA | NA |
| <b>KC11</b> | male   | 62 | NA | NA | NA |
| <b>KC12</b> | female | 48 | NA | NA | NA |
| <b>KC13</b> | female | 59 | NA | NA | NA |
| <b>KC14</b> | female | 28 | NA | NA | NA |
| <b>KC15</b> | female | 57 | NA | NA | NA |
| <b>KC16</b> | female | 38 | NA | NA | NA |
| <b>KC17</b> | male   | 62 | NA | NA | NA |
| <b>KC18</b> | female | 66 | NA | NA | NA |
| <b>KC19</b> | female | 50 | NA | NA | NA |
| <b>KC20</b> | male   | 22 | NA | NA | NA |
| <b>PC01</b> | male   | 72 | NA | NA | NA |
| <b>PC02</b> | male   | 83 | NA | NA | NA |
| <b>PC03</b> | male   | 72 | NA | NA | NA |
| <b>PC04</b> | male   | 75 | NA | NA | NA |
| <b>PC05</b> | male   | 68 | NA | NA | NA |
| <b>PC06</b> | male   | 73 | NA | NA | NA |
| <b>PC07</b> | male   | 70 | NA | NA | NA |
| <b>PC08</b> | male   | 70 | NA | NA | NA |
| <b>PC09</b> | male   | 68 | NA | NA | NA |
| <b>PC10</b> | male   | 66 | NA | NA | NA |
| <b>PC11</b> | male   | 73 | NA | NA | NA |
| <b>PC12</b> | male   | 72 | NA | NA | NA |
| <b>PC13</b> | male   | 74 | NA | NA | NA |
| <b>PC14</b> | male   | 68 | NA | NA | NA |
| <b>PC15</b> | male   | 70 | NA | NA | NA |
| <b>PC16</b> | male   | 78 | NA | NA | NA |
| <b>PC17</b> | male   | 67 | NA | NA | NA |
| <b>PC18</b> | male   | 70 | NA | NA | NA |
| <b>PC19</b> | male   | 65 | NA | NA | NA |
| <b>PC20</b> | male   | 70 | NA | NA | NA |

UCC: Urothelial cell carcinoma; HV: Healthy volunteers; IUC: Infected urinary calculi; KC: Kidney cancer; PC: Prostate cancer.

**Supplementary Table S2: Clinical information of the validation set**

| <b>Case ID</b> | <b>gender</b> | <b>age</b> | <b>grade</b> | <b>TNM</b> | <b>primary/<br/>recurrent</b> |
|----------------|---------------|------------|--------------|------------|-------------------------------|
| UCC01          | male          | 43         | high         | T2bN0M0    | primary                       |
| UCC02          | male          | 75         | high         | T2bN0M0    | primary                       |
| UCC03          | female        | 56         | high         | T2aN0M0    | recurrent                     |
| UCC04          | male          | 43         | low          | TaN0M0     | primary                       |
| UCC05          | female        | 65         | high         | T2N0M0     | recurrent                     |
| UCC06          | male          | 62         | high         | TaN0M0     | primary                       |
| UCC07          | male          | 56         | low          | TaN0M0     | primary                       |
| UCC08          | male          | 70         | high         | T1N0M0     | primary                       |
| UCC09          | male          | 64         | high         | T1N0M0     | recurrent                     |
| UCC10          | male          | 49         | high         | T2aN0M0    | recurrent                     |
| UCC11          | male          | 72         | high         | T3bN2M0    | primary                       |
| UCC12          | male          | 57         | high         | T3aN0M0    | primary                       |
| UCC13          | male          | 51         | high         | T3aN0M0    | primary                       |
| UCC14          | male          | 57         | high         | T1N0M0     | primary                       |
| UCC15          | male          | 59         | high         | T1N0M0     | primary                       |
| UCC16          | female        | 81         | high         | T1N0M0     | primary                       |
| UCC17          | male          | 50         | high         | T2N0M0     | recurrent                     |
| UCC18          | male          | 59         | high         | T3N0M0     | primary                       |
| UCC19          | male          | 80         | high         | T1N0M0     | primary                       |
| UCC20          | male          | 55         | high         | T3bN0M0    | primary                       |
| UCC21          | female        | 55         | low          | T1N0M0     | primary                       |
| UCC22          | male          | 61         | high         | T2bN0M0    | primary                       |
| UCC23          | male          | 73         | high         | T1N0M0     | primary                       |
| UCC24          | male          | 57         | low          | TaN0M0     | recurrent                     |
| UCC25          | male          | 39         | low          | T2aN0M0    | primary                       |
| UCC26          | male          | 67         | high         | T1N0M0     | primary                       |
| UCC27          | female        | 62         | low          | TaN0M0     | recurrent                     |
| UCC28          | female        | 65         | low          | TaN0M0     | primary                       |
| UCC29          | male          | 70         | high         | T1N0M0     | primary                       |
| UCC30          | male          | 58         | low          | T1N0M0     | primary                       |
| UCC31          | male          | 80         | high         | T1N0M0     | primary                       |
| UCC32          | male          | 70         | high         | T1N0M0     | primary                       |
| UCC33          | male          | 65         | high         | T1N0M0     | primary                       |
| UCC34          | male          | 69         | high         | TaN0M0     | primary                       |
| UCC35          | female        | 53         | low          | T1N0M0     | primary                       |
| UCC36          | female        | 63         | high         | TaN0M0     | primary                       |
| UCC37          | male          | 36         | high         | T2aN0M0    | primary                       |
| UCC38          | male          | 71         | high         | TaN0M0     | primary                       |

|              |        |    |      |         |           |
|--------------|--------|----|------|---------|-----------|
| <b>UCC39</b> | male   | 59 | low  | T2aN0M0 | primary   |
| <b>UCC40</b> | male   | 44 | low  | TaN0M0  | recurrent |
| <b>UCC41</b> | male   | 70 | high | T1N0M0  | primary   |
| <b>UCC42</b> | female | 55 | high | T4aN2M0 | primary   |
| <b>UCC43</b> | male   | 47 | low  | TaN0M0  | primary   |
| <b>UCC44</b> | male   | 59 | high | T1N0M0  | recurrent |
| <b>UCC45</b> | male   | 56 | low  | T1N0M0  | primary   |
| <b>UCC46</b> | male   | 58 | high | T2N0M0  | recurrent |
| <b>UCC47</b> | male   | 68 | high | T4aN2M0 | primary   |
| <b>UCC48</b> | male   | 63 | high | T1N0M0  | primary   |
| <b>UCC49</b> | male   | 79 | high | T2bN0M0 | primary   |
| <b>UCC50</b> | female | 63 | low  | TaN0M0  | primary   |
| <b>UCC51</b> | male   | 58 | high | T1N0M0  | recurrent |
| <b>UCC52</b> | male   | 84 | high | T1N0M0  | recurrent |
| <b>UCC53</b> | male   | 60 | high | T3aN1M0 | recurrent |
| <b>UCC54</b> | male   | 62 | high | T3aN1M0 | recurrent |
| <b>UCC55</b> | male   | 63 | high | T3aN1M0 | recurrent |
| <b>UCC56</b> | female | 63 | high | T2bN0M0 | primary   |
| <b>UCC57</b> | female | 65 | low  | T1N0M0  | primary   |
| <b>UCC58</b> | male   | 63 | high | T1N0M0  | primary   |
| <b>UCC59</b> | male   | 53 | low  | TaN0M0  | primary   |
| <b>UCC60</b> | male   | 60 | high | T1N0M0  | primary   |
| <b>UCC61</b> | male   | 74 | high | T1N0M0  | primary   |
| <b>UCC62</b> | male   | 67 | high | TaN0M0  | primary   |
| <b>UCC63</b> | female | 55 | high | T1N0M0  | recurrent |
| <b>UCC64</b> | male   | 59 | high | T4N1M0  | primary   |
| <b>UCC65</b> | male   | 72 | high | T2N0M0  | primary   |
| <b>UCC66</b> | male   | 58 | low  | TaN0M0  | primary   |
| <b>UCC67</b> | male   | 65 | low  | TaN0M0  | primary   |
| <b>UCC68</b> | male   | 70 | low  | TaN0M0  | primary   |
| <b>UCC69</b> | male   | 57 | high | T1N0M0  | primary   |
| <b>UCC70</b> | male   | 64 | high | T2bN0M0 | primary   |
| <b>UCC71</b> | female | 52 | high | T4aN2M0 | primary   |
| <b>UCC72</b> | male   | 61 | high | T1N0M0  | primary   |
| <b>HV01</b>  | female | 42 | NA   | NA      | NA        |
| <b>HV02</b>  | male   | 31 | NA   | NA      | NA        |
| <b>HV03</b>  | male   | 37 | NA   | NA      | NA        |
| <b>HV04</b>  | female | 35 | NA   | NA      | NA        |
| <b>HV05</b>  | male   | 34 | NA   | NA      | NA        |

|              |        |    |    |    |    |
|--------------|--------|----|----|----|----|
| <b>HV06</b>  | male   | 30 | NA | NA | NA |
| <b>HV07</b>  | male   | 45 | NA | NA | NA |
| <b>HV08</b>  | male   | 28 | NA | NA | NA |
| <b>HV09</b>  | male   | 29 | NA | NA | NA |
| <b>HV10</b>  | male   | 32 | NA | NA | NA |
| <b>HV11</b>  | male   | 43 | NA | NA | NA |
| <b>HV12</b>  | female | 30 | NA | NA | NA |
| <b>HV13</b>  | female | 30 | NA | NA | NA |
| <b>HV14</b>  | male   | 33 | NA | NA | NA |
| <b>HV15</b>  | male   | 39 | NA | NA | NA |
| <b>HV16</b>  | female | 29 | NA | NA | NA |
| <b>HV17</b>  | male   | 44 | NA | NA | NA |
| <b>HV18</b>  | female | 28 | NA | NA | NA |
| <b>HV19</b>  | female | 29 | NA | NA | NA |
| <b>HV20</b>  | male   | 29 | NA | NA | NA |
| <b>HV21</b>  | male   | 36 | NA | NA | NA |
| <b>HV22</b>  | male   | 32 | NA | NA | NA |
| <b>HV23</b>  | male   | 35 | NA | NA | NA |
| <b>IUC01</b> | female | 41 | NA | NA | NA |
| <b>IUC02</b> | male   | 44 | NA | NA | NA |
| <b>IUC03</b> | female | 59 | NA | NA | NA |
| <b>IUC04</b> | female | 27 | NA | NA | NA |
| <b>IUC05</b> | female | 43 | NA | NA | NA |
| <b>IUC06</b> | female | 38 | NA | NA | NA |
| <b>IUC07</b> | male   | 38 | NA | NA | NA |
| <b>IUC08</b> | male   | 56 | NA | NA | NA |
| <b>IUC09</b> | male   | 58 | NA | NA | NA |
| <b>IUC10</b> | female | 39 | NA | NA | NA |
| <b>IUC11</b> | female | 60 | NA | NA | NA |
| <b>IUC12</b> | male   | 51 | NA | NA | NA |
| <b>IUC13</b> | male   | 26 | NA | NA | NA |
| <b>IUC14</b> | female | 32 | NA | NA | NA |
| <b>IUC15</b> | male   | 41 | NA | NA | NA |
| <b>IUC16</b> | male   | 56 | NA | NA | NA |
| <b>IUC17</b> | male   | 36 | NA | NA | NA |
| <b>IUC18</b> | female | 60 | NA | NA | NA |
| <b>IUC19</b> | female | 65 | NA | NA | NA |
| <b>IUC20</b> | male   | 31 | NA | NA | NA |
| <b>IUC21</b> | female | 33 | NA | NA | NA |



|             |        |    |    |    |    |
|-------------|--------|----|----|----|----|
| <b>KC01</b> | male   | 58 | NA | NA | NA |
| <b>KC02</b> | male   | 66 | NA | NA | NA |
| <b>KC03</b> | male   | 54 | NA | NA | NA |
| <b>KC04</b> | male   | 64 | NA | NA | NA |
| <b>KC05</b> | male   | 59 | NA | NA | NA |
| <b>KC06</b> | female | 67 | NA | NA | NA |
| <b>KC07</b> | female | 57 | NA | NA | NA |
| <b>KC08</b> | female | 60 | NA | NA | NA |
| <b>KC09</b> | male   | 52 | NA | NA | NA |
| <b>KC10</b> | male   | 44 | NA | NA | NA |
| <b>KC11</b> | female | 54 | NA | NA | NA |
| <b>KC12</b> | female | 62 | NA | NA | NA |
| <b>KC13</b> | male   | 71 | NA | NA | NA |
| <b>KC14</b> | female | 60 | NA | NA | NA |
| <b>KC15</b> | male   | 66 | NA | NA | NA |
| <b>KC16</b> | female | 78 | NA | NA | NA |
| <b>KC17</b> | male   | 61 | NA | NA | NA |
| <b>KC18</b> | male   | 52 | NA | NA | NA |
| <b>KC19</b> | male   | 68 | NA | NA | NA |
| <b>KC20</b> | female | 66 | NA | NA | NA |
| <b>KC21</b> | female | 67 | NA | NA | NA |
| <b>KC22</b> | male   | 41 | NA | NA | NA |
| <b>KC23</b> | female | 63 | NA | NA | NA |
| <b>KC24</b> | male   | 65 | NA | NA | NA |
| <b>KC25</b> | male   | 65 | NA | NA | NA |
| <b>KC26</b> | male   | 64 | NA | NA | NA |
| <b>PC01</b> | male   | 70 | NA | NA | NA |
| <b>PC02</b> | male   | 84 | NA | NA | NA |
| <b>PC03</b> | male   | 71 | NA | NA | NA |
| <b>PC04</b> | male   | 70 | NA | NA | NA |
| <b>PC05</b> | male   | 75 | NA | NA | NA |
| <b>PC06</b> | male   | 81 | NA | NA | NA |
| <b>PC07</b> | male   | 81 | NA | NA | NA |
| <b>PC08</b> | male   | 83 | NA | NA | NA |
| <b>PC09</b> | male   | 82 | NA | NA | NA |
| <b>PC10</b> | male   | 82 | NA | NA | NA |
| <b>PC11</b> | male   | 83 | NA | NA | NA |
| <b>PC12</b> | male   | 81 | NA | NA | NA |
| <b>PC13</b> | male   | 69 | NA | NA | NA |

|      |      |    |    |    |    |
|------|------|----|----|----|----|
| PC14 | male | 75 | NA | NA | NA |
| PC15 | male | 80 | NA | NA | NA |
| PC16 | male | 75 | NA | NA | NA |
| PC17 | male | 66 | NA | NA | NA |
| PC18 | male | 84 | NA | NA | NA |
| PC19 | male | 68 | NA | NA | NA |
| PC20 | male | 72 | NA | NA | NA |
| PC21 | male | 77 | NA | NA | NA |
| PC22 | male | 69 | NA | NA | NA |

UCC: Urothelial cell carcinoma; HV: Healthy volunteers; IUC: Infected urinary calculi; KC: Kidney cancer; PC: Prostate cancer.

**Supplementary Table S3: List of the primers of methylation biomarkers**

| Gene                    | Primers                                                                     | Product size (bp) |
|-------------------------|-----------------------------------------------------------------------------|-------------------|
| ACTB-1 (Reference gene) | F:TAGGGAGTATATAGGTTGGGGAAGTT<br>R:AACACACAATAACAAACACAAATTCAC               | 103               |
| ACTB-2 (Reference gene) | F:TGGTGATGGAGGAGGTTTAGTAAGT<br>R:AACCAATAAAACCTACTCCTCCCTTAA                | 133               |
| ACTB-3 (Reference gene) | F:TGGTGATGGAGGAGGTTTAGTAGGT<br>R:ACCAATAAAACCTACTCCTCCCTTAA                 | 133               |
| ALU-C4 (Reference gene) | F:GGTTAGGTATAGTGGTTTATATTTGTAATTTAGTA<br>R:ATTAATAAACTAATCTTAAACTCCTAACCTCA | 89                |
| EOMES                   | F:GGTTGGGGAAGTAGAGTTTCGAT<br>R:ATAAACAATTACAAACGCCGCCA                      | 80                |
| GDF15                   | F:TCGGCGGTTATTTGTATTTGC<br>R:CGTCGAAAACAACCGAAACA                           | 101               |
| HOXA9                   | F:GTGGTTATTATCGTGTTTAGCGT<br>R:CCGATACCACCAAATTATTACATA                     | 110               |
| MYO3A                   | F:TCGGCGGGAGGATTTGAT<br>R:CCCGGAACCGAAATAAAA                                | 93                |
| NID2                    | F:GCGGTTTTTAAGGAGTTTTATTTTC<br>R:CTACGAAATTCCTTTACGCT                       | 99                |
| PCDH17-1                | F:ATAGGTTTGGGATGTA<br>R:GAAAAACAATAACTTA                                    | 329               |
| PCDH17-2                | F:CGGCGGAGGGCGTAGTA<br>R:GTCCACGTCCAACAAATACGATAC                           | 73                |
| POU4F2                  | F:GTTGTGCGAAGTTGAGTTTATTC<br>R:CCGTTCAAATAACAACAAAACGA                      | 142               |
| TCF21-1                 | F:AGGATTTTTAAGAGGTGG<br>R:AAACCTTACTCAACTC                                  | 267               |
| TCF21-2                 | F:GTTAAGAGGAGGAAGGCGTTTATT<br>R:CCTTACTCAACTCGCATAACGA                      | 124               |
| TMEFF2                  | F:GTTTCGGGTTACGCGC<br>R:TTCGCCTCACTCTCCGCT                                  | 83                |

|        |                                                            |     |
|--------|------------------------------------------------------------|-----|
| TWIST1 | F:GTTAGGGTTCGGGGGCGTTGTT<br>R:CCGTGCGCCTTCCTCCGACGAA       | 92  |
| VIM    | F:TTCGGGAGTTAGTTCGCGTT<br>R:ACCGCCGAACATCCTACGA            | 103 |
| ZNF154 | F:TTTATCGGATTAGAGATAGTAGAGCGT<br>R:TAACGTAAATCCCCAAAACGACG | 152 |

F: forward primer; R: reverse primer.
